# Supplementary material
Source: PubMed Central journal article supplement (PMC6292678)
Supplement: NIHMS983990-supplement-A1.pdf [file NIHMS983990-supplement-A1.pdf]

**Bacterial STI Screening Rates by Symptomatic Status  
among Men Who Have Sex with Men in the United States:  
A Hierarchical Bayesian Analysis**

Supplemental Appendix

**Table S1.** Census Region and Division Categorization

| <b>Region</b>               | <b>Division</b>             | <b>State</b>   |
|-----------------------------|-----------------------------|----------------|
| Northeast                   | <i>1 New England</i>        | Connecticut    |
|                             |                             | Maine          |
|                             |                             | Massachusetts  |
|                             |                             | New Hampshire  |
|                             |                             | Rhode Island   |
|                             | <i>2 Middle Atlantic</i>    | New Jersey     |
| New York                    |                             |                |
| Pennsylvania                |                             |                |
| Midwest                     | <i>3 East North Central</i> | Illinois       |
|                             |                             | Indiana        |
|                             |                             | Michigan       |
|                             |                             | Ohio           |
|                             |                             | Wisconsin      |
|                             | <i>4 West North Central</i> | Iowa           |
|                             |                             | Kansas         |
|                             |                             | Minnesota      |
|                             |                             | Missouri       |
|                             |                             | Nebraska       |
| South                       | <i>5 South Atlantic</i>     | North Dakota   |
|                             |                             | South Dakota   |
|                             |                             | Delaware       |
|                             |                             | Florida        |
|                             |                             | Georgia        |
|                             |                             | Maryland       |
|                             |                             | North Carolina |
|                             |                             | South Carolina |
|                             | Virginia                    |                |
|                             | West Virginia               |                |
|                             | Washington, D. C.           |                |
|                             | <i>6 East South Central</i> | Alabama        |
|                             |                             | Kentucky       |
| Mississippi                 |                             |                |
| Tennessee                   |                             |                |
| <i>7 West South Central</i> | Arkansas                    |                |
|                             | Louisiana                   |                |
|                             | Oklahoma                    |                |
|                             | Texas                       |                |
| West                        | <i>8 Mountain</i>           | Arizona        |
|                             |                             | Colorado       |
|                             |                             | Montana        |
|                             |                             | Nevada         |
|                             |                             | New Mexico     |
|                             |                             | Utah           |
|                             |                             | Wyoming        |
|                             | <i>9 Pacific</i>            | Alaska         |
|                             |                             | California     |
|                             |                             | Hawaii         |
|                             |                             | Oregon         |
|                             |                             | Washington     |

**Figure S1.** Geographic Distribution of ART-Net Respondents (n = 2,572)

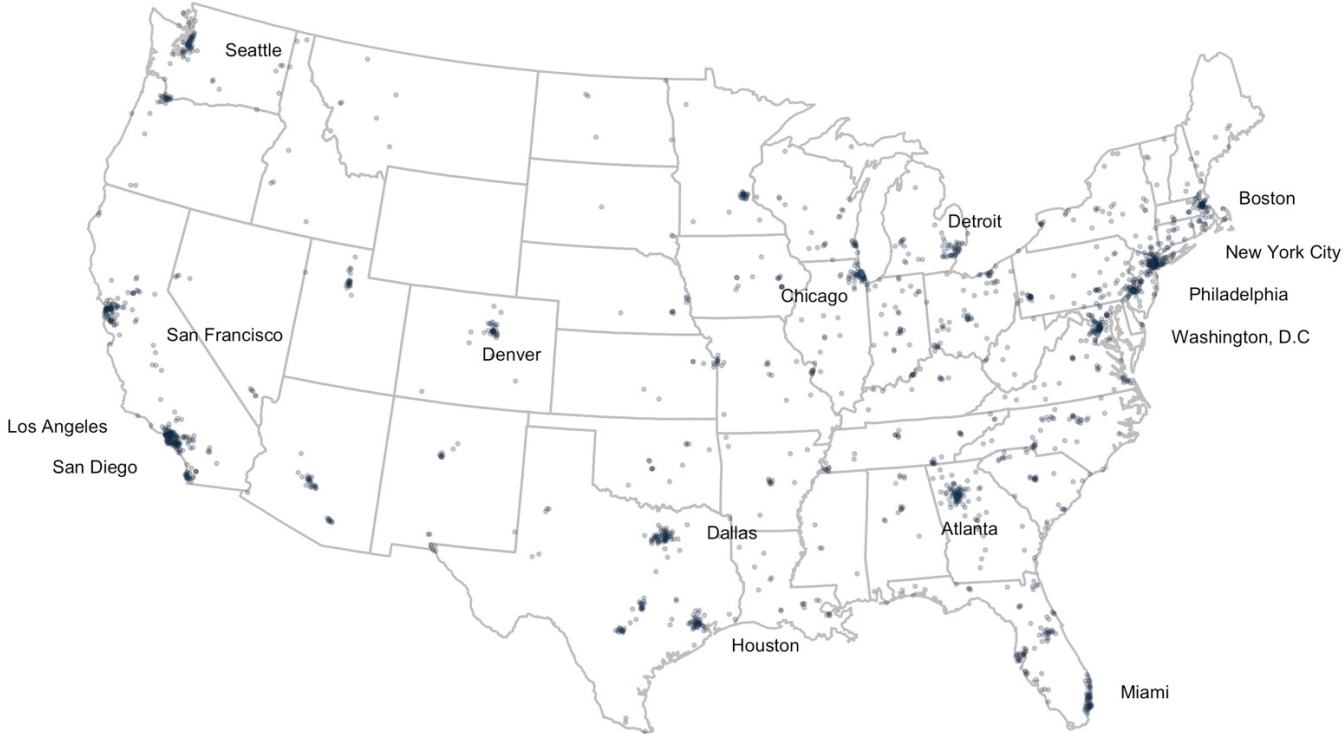

**Table S2.** Varying Intercept Negative Binomial Model Coefficients for Per-Year Rates of All Bacterial STI (Syphilis, Gonorrhea, Chlamydia) Testing/Screening by Symptomatic Status among US Men Who Have Sex with Men

|                             | All Testing/Screening |                  | Symptomatic Testing |                 | Asymptomatic Screening |                  |
|-----------------------------|-----------------------|------------------|---------------------|-----------------|------------------------|------------------|
|                             | Estimate              | 95% CrI          | Estimate            | 95% CrI         | Estimate               | 95% CrI          |
| <b>Geography</b>            |                       |                  |                     |                 |                        |                  |
| Average Intercept           | -1.195                | -1.628, -0.758   | -2.724              | -3.581, -1.854  | -1.271                 | -1.752, -0.763   |
| City                        |                       |                  |                     |                 |                        |                  |
| Atlanta                     | -1.201                | -1.656, -0.747   | -2.586              | -3.474, -1.683  | -1.302                 | -1.814, -0.777   |
| Boston                      | -1.148                | -1.611, -0.673   | -2.797              | -3.703, -1.869  | -1.191                 | -1.719, -0.645   |
| Chicago                     | -1.170                | -1.630, -0.714   | -2.872              | -3.783, -1.957  | -1.208                 | -1.730, -0.677   |
| Dallas                      | -1.224                | -1.696, -0.753   | -2.869              | -3.792, -1.949  | -1.277                 | -1.799, -0.735   |
| Denver                      | -1.162                | -1.634, -0.686   | -2.785              | -3.723, -1.838  | -1.221                 | -1.772, -0.650   |
| Detroit                     | -1.151                | -1.626, -0.670   | -2.598              | -3.518, -1.650  | -1.248                 | -1.792, -0.695   |
| Houston                     | -1.325                | -1.808, -0.850   | -2.662              | -3.585, -1.726  | -1.464                 | -2.009, -0.910   |
| Los Angeles                 | -1.173                | -1.625, -0.716   | -2.745              | -3.630, -1.835  | -1.237                 | -1.743, -0.710   |
| Miami                       | -1.046                | -1.514, -0.570   | -2.637              | -3.549, -1.721  | -1.123                 | -1.647, -0.563   |
| New York City               | -1.160                | -1.609, -0.707   | -2.684              | -3.571, -1.768  | -1.240                 | -1.745, -0.710   |
| Philadelphia                | -1.252                | -1.711, -0.791   | -2.583              | -3.493, -1.662  | -1.396                 | -1.924, -0.859   |
| San Diego                   | -1.089                | -1.562, -0.606   | -2.675              | -3.599, -1.729  | -1.148                 | -1.685, -0.586   |
| San Francisco               | -1.003                | -1.474, -0.526   | -2.653              | -3.554, -1.731  | -1.058                 | -1.584, -0.514   |
| Seattle                     | -1.172                | -1.636, -0.703   | -2.654              | -3.564, -1.732  | -1.260                 | -1.785, -0.708   |
| Washington DC               | -1.258                | -1.725, -0.802   | -2.652              | -3.546, -1.732  | -1.363                 | -1.893, -0.830   |
| Census Division             |                       |                  |                     |                 |                        |                  |
| 1 New England               | -1.239                | -1.716, -0.770   | -2.827              | -3.764, -1.903  | -1.299                 | -1.831, -0.757   |
| 2 Middle Atlantic           | -1.198                | -1.660, -0.729   | -2.671              | -3.565, -1.756  | -1.287                 | -1.817, -0.742   |
| 3 East North Central        | -1.358                | -1.819, -0.896   | -2.832              | -3.736, -1.911  | -1.438                 | -1.955, -0.906   |
| 4 West North Central        | -1.196                | -1.650, -0.744   | -2.809              | -3.705, -1.899  | -1.259                 | -1.773, -0.731   |
| 5 South Atlantic            | -1.315                | -1.767, -0.859   | -2.813              | -3.697, -1.916  | -1.391                 | -1.894, -0.870   |
| 6 East South Central        | -1.236                | -1.709, -0.763   | -2.808              | -3.709, -1.890  | -1.301                 | -1.821, -0.758   |
| 7 West South Central        | -1.109                | -1.561, -0.653   | -2.668              | -3.568, -1.750  | -1.176                 | -1.685, -0.653   |
| 8 Mountain                  | -1.288                | -1.760, -0.822   | -2.705              | -3.595, -1.788  | -1.381                 | -1.908, -0.843   |
| 9 Pacific                   | -1.190                | -1.641, -0.736   | -2.791              | -3.693, -1.873  | -1.246                 | -1.756, -0.722   |
| <b>Race</b>                 |                       |                  |                     |                 |                        |                  |
| Black (Non-Hisp)            | 0.337                 | 0.157, 0.571     | 0.335               | -0.042, 0.702   | 0.344                  | 0.141, 0.551     |
| Hispanic                    | 0.126                 | -0.006, 0.260    | 0.285               | 0.017, 0.551    | 0.090                  | -0.062, 0.239    |
| Other (Non-Hisp)            | 0.156                 | -0.001, 0.308    | 0.072               | -0.263, 0.411   | 0.174                  | 0.002, 0.348     |
| White (Non-Hisp)            | Ref                   | -                | Ref                 | -               | Ref                    | -                |
| <b>Age</b>                  |                       |                  |                     |                 |                        |                  |
| Linear                      | 0.066                 | 0.043, 0.089     | 0.041               | -0.007, 0.088   | 0.063                  | 0.036, 0.088     |
| Quadratic                   | -0.0009               | -0.0012, -0.0007 | -0.0008             | -0.0014, 0.0002 | -0.0009                | -0.0012, -0.0006 |
| <b>HIV status</b>           |                       |                  |                     |                 |                        |                  |
| Uninfected                  | Ref                   | -                | Ref                 | -               | Ref                    | -                |
| Infected                    | 0.543                 | 0.401, 0.680     | 0.640               | 0.364, 0.919    | 0.543                  | 0.387, 0.703     |
| <b>Number of Partners</b>   |                       |                  |                     |                 |                        |                  |
| Linear                      | 0.014                 | 0.011, 0.016     | 0.026               | 0.022, 0.031    | 0.011                  | 0.008, 0.014     |
| <b>Dispersion Parameter</b> |                       |                  |                     |                 |                        |                  |
|                             | 1.193                 | 1.082, 1.322     | 0.481               | 0.389, 0.603    | 0.934                  | 0.847, 1.035     |

· 95% CrI = 95% credible interval

**Table S3.** Varying Intercept & Varying Slope Negative Binomial Model Predictions for Per-Year Rates of All Bacterial STI (Syphilis, Gonorrhea, Chlamydia) Testing/Screening by Symptomatic Status among US Men Who Have Sex with Men

|                       | All Testing/Screening |                | Symptomatic Testing |                | Asymptomatic Screening |                |
|-----------------------|-----------------------|----------------|---------------------|----------------|------------------------|----------------|
|                       | <i>Estimate</i>       | <i>95% CrI</i> | <i>Estimate</i>     | <i>95% CrI</i> | <i>Estimate</i>        | <i>95% CrI</i> |
| <b>HIV-Uninfected</b> |                       |                |                     |                |                        |                |
| City-Averaged         | 1.02                  | 0.90, 1.18     | 0.14                | 0.12, 0.17     | 0.88                   | 0.77, 1.01     |
| Atlanta               | 1.02                  | 0.84, 1.23     | 0.17                | 0.12, 0.24     | 0.85                   | 0.69, 1.05     |
| Boston                | 1.14                  | 0.89, 1.48     | 0.12                | 0.07, 0.19     | 1.03                   | 0.80, 1.34     |
| Chicago               | 1.10                  | 0.90, 1.34     | 0.13                | 0.09, 0.19     | 0.96                   | 0.78, 1.19     |
| Dallas                | 0.88                  | 0.69, 1.13     | 0.09                | 0.06, 0.15     | 0.80                   | 0.62, 1.05     |
| Denver                | 1.07                  | 0.79, 1.46     | 0.12                | 0.07, 0.21     | 0.94                   | 0.68, 1.33     |
| Detroit               | 1.11                  | 0.83, 1.51     | 0.16                | 0.10, 0.28     | 0.93                   | 0.68, 1.31     |
| Houston               | 0.94                  | 0.72, 1.20     | 0.22                | 0.15, 0.35     | 0.69                   | 0.52, 0.91     |
| Los Angeles           | 1.11                  | 0.92, 1.35     | 0.16                | 0.11, 0.23     | 0.95                   | 0.78, 1.16     |
| Miami                 | 1.27                  | 0.99, 1.67     | 0.17                | 0.11, 0.27     | 1.08                   | 0.82, 1.44     |
| New York City         | 1.17                  | 1.01, 1.36     | 0.16                | 0.12, 0.22     | 0.99                   | 0.84, 1.17     |
| Philadelphia          | 1.00                  | 0.78, 1.27     | 0.24                | 0.16, 0.36     | 0.73                   | 0.55, 0.95     |
| San Diego             | 1.17                  | 0.89, 1.58     | 0.14                | 0.08, 0.25     | 1.04                   | 0.77, 1.41     |
| San Francisco         | 1.38                  | 1.11, 1.70     | 0.18                | 0.12, 0.27     | 1.17                   | 0.93, 1.49     |
| Seattle               | 1.05                  | 0.83, 1.44     | 0.16                | 0.10, 0.24     | 0.89                   | 0.68, 1.15     |
| Washington DC         | 1.02                  | 0.84, 1.24     | 0.17                | 0.12, 0.25     | 0.84                   | 0.68, 1.05     |
| <b>HIV-Infected</b>   |                       |                |                     |                |                        |                |
| City-Averaged         | 1.78                  | 1.46, 2.18     | 0.25                | 0.18, 0.35     | 1.53                   | 1.24, 1.88     |
| Atlanta               | 2.07                  | 1.56, 3.04     | 0.34                | 0.22, 0.65     | 1.66                   | 1.23, 2.44     |
| Boston                | 1.93                  | 1.26, 2.91     | 0.22                | 0.12, 0.45     | 1.74                   | 1.10, 2.60     |
| Chicago               | 1.97                  | 1.44, 2.81     | 0.22                | 0.12, 0.41     | 1.74                   | 1.27, 2.51     |
| Dallas                | 1.57                  | 1.11, 2.27     | 0.16                | 0.08, 0.30     | 1.44                   | 1.00, 2.11     |
| Denver                | 1.86                  | 1.20, 2.90     | 0.20                | 0.09, 0.43     | 1.67                   | 1.06, 2.64     |
| Detroit               | 1.88                  | 1.19, 2.86     | 0.29                | 0.14, 0.60     | 1.58                   | 0.98, 2.49     |
| Houston               | 1.52                  | 0.96, 2.21     | 0.38                | 0.20, 0.70     | 1.14                   | 0.69, 1.69     |
| Los Angeles           | 1.89                  | 1.35, 2.62     | 0.30                | 0.18, 0.53     | 1.60                   | 1.10, 2.20     |
| Miami                 | 2.16                  | 1.51, 3.12     | 0.29                | 0.15, 0.54     | 1.87                   | 1.29, 2.70     |
| New York City         | 1.95                  | 1.41, 2.60     | 0.28                | 0.17, 0.48     | 1.68                   | 1.20, 2.26     |
| Philadelphia          | 1.65                  | 1.06, 2.40     | 0.40                | 0.21, 0.77     | 1.22                   | 0.77, 1.81     |
| San Diego             | 1.99                  | 1.33, 2.97     | 0.26                | 0.14, 0.51     | 1.75                   | 1.13, 2.63     |
| San Francisco         | 2.38                  | 1.66, 3.38     | 0.35                | 0.20, 0.64     | 2.02                   | 1.36, 2.90     |
| Seattle               | 1.98                  | 1.40, 2.98     | 0.28                | 0.15, 0.53     | 1.67                   | 1.18, 2.57     |
| Washington DC         | 1.76                  | 1.19, 2.59     | 0.29                | 0.14, 0.53     | 1.49                   | 1.00, 2.22     |

**Table S4.** Varying Intercept Logistic Model Coefficients for Never Testing/Screening for All Bacterial STI (Syphilis, Gonorrhea, Chlamydia) in the Past 2 Years by Symptomatic Status among US Men Who Have Sex with Men

|                             | All Testing/Screening |                | Symptomatic Testing |                | Asymptomatic Screening |                |
|-----------------------------|-----------------------|----------------|---------------------|----------------|------------------------|----------------|
|                             | Estimate              | 95% CrI        | Estimate            | 95% CrI        | Estimate               | 95% CrI        |
| <b>Geography</b>            |                       |                |                     |                |                        |                |
| Average Intercept           | 1.125                 | 0.395, 1.831   | 1.939               | 1.123, 2.828   | 0.839                  | 0.161, 1.533   |
| City                        |                       |                |                     |                |                        |                |
| <i>Atlanta</i>              | 1.253                 | 0.485, 2.011   | 1.839               | 0.978, 2.773   | 0.991                  | 0.264, 1.722   |
| <i>Boston</i>               | 1.079                 | 0.273, 1.853   | 2.029               | 1.138, 2.984   | 0.741                  | -0.019, 1.498  |
| <i>Chicago</i>              | 1.159                 | 0.373, 1.927   | 2.048               | 1.173, 3.000   | 0.770                  | 0.033, 1.519   |
| <i>Dallas</i>               | 1.301                 | 0.514, 2.079   | 2.026               | 1.135, 2.973   | 0.881                  | 0.151, 1.631   |
| <i>Denver</i>               | 1.120                 | 0.287, 1.915   | 1.940               | 1.041, 2.910   | 0.839                  | 0.056, 1.622   |
| <i>Detroit</i>              | 1.207                 | 0.380, 2.008   | 1.858               | 0.942, 2.835   | 1.037                  | 0.296, 1.848   |
| <i>Houston</i>              | 1.182                 | 0.382, 1.959   | 1.911               | 1.036, 2.851   | 0.933                  | 0.184, 1.681   |
| <i>Los Angeles</i>          | 1.055                 | 0.290, 1.805   | 1.940               | 1.066, 2.862   | 0.802                  | 0.098, 1.525   |
| <i>Miami</i>                | 0.988                 | 0.175, 1.769   | 1.842               | 0.940, 2.793   | 0.652                  | -0.109, 1.399  |
| <i>New York City</i>        | 0.919                 | 0.157, 1.648   | 1.777               | 0.897, 2.709   | 0.730                  | 0.012, 1.462   |
| <i>Philadelphia</i>         | 1.301                 | 0.515, 2.079   | 1.882               | 0.990, 2.812   | 1.079                  | 0.338, 1.847   |
| <i>San Diego</i>            | 0.885                 | 0.041, 1.687   | 1.875               | 0.953, 2.845   | 0.629                  | -0.171, 1.416  |
| <i>San Francisco</i>        | 0.871                 | 0.051, 1.646   | 1.825               | 0.926, 2.775   | 0.639                  | -0.116, 1.388  |
| <i>Seattle</i>              | 1.041                 | 0.238, 1.808   | 1.826               | 0.929, 2.776   | 0.765                  | 0.026, 1.515   |
| <i>Washington DC</i>        | 1.190                 | 0.410, 1.953   | 1.916               | 1.037, 2.862   | 0.900                  | 0.168, 1.642   |
| Census Division             |                       |                |                     |                |                        |                |
| <i>1 New England</i>        | 1.163                 | 0.366, 1.947   | 2.075               | 1.189, 3.034   | 0.900                  | 0.157, 1.658   |
| <i>2 Middle Atlantic</i>    | 1.215                 | 0.433, 1.986   | 1.943               | 1.048, 2.890   | 0.863                  | 0.127, 1.608   |
| <i>3 East North Central</i> | 1.332                 | 0.572, 2.091   | 2.077               | 1.201, 3.018   | 1.018                  | 0.290, 1.759   |
| <i>4 West North Central</i> | 0.999                 | 0.233, 1.747   | 2.028               | 1.167, 2.962   | 0.774                  | 0.051, 1.504   |
| <i>5 South Atlantic</i>     | 1.260                 | 0.496, 1.992   | 2.031               | 1.180, 2.954   | 0.914                  | 0.217, 1.635   |
| <i>6 East South Central</i> | 1.322                 | 0.524, 2.105   | 2.046               | 1.164, 3.000   | 0.962                  | 0.221, 1.725   |
| <i>7 West South Central</i> | 0.932                 | 0.147, 1.681   | 1.832               | 0.947, 2.773   | 0.705                  | -0.031, 1.437  |
| <i>8 Mountain</i>           | 1.165                 | 0.385, 1.921   | 2.049               | 1.172, 3.000   | 0.882                  | 0.152, 1.619   |
| <i>9 Pacific</i>            | 1.006                 | 0.227, 1.759   | 1.956               | 1.072, 2.888   | 0.753                  | 0.023, 1.484   |
| <b>Race</b>                 |                       |                |                     |                |                        |                |
| Black (Non-Hisp)            | -1.031                | -1.522, -0.580 | -0.364              | -0.755, 0.041  | -0.806                 | -1.220, -0.415 |
| Hispanic                    | -0.093                | -0.363, 0.165  | -0.145              | -0.429, 0.142  | 0.070                  | -0.173, 0.318  |
| Other (Non-Hisp)            | 0.140                 | -0.154, 0.432  | 0.139               | -0.217, 0.508  | 0.089                  | -0.199, 0.374  |
| White (Non-Hisp)            | Ref                   | -              | Ref                 | -              | Ref                    | -              |
| <b>Age</b>                  |                       |                |                     |                |                        |                |
| Linear                      | -0.102                | -0.139, -0.063 | -0.034              | -0.83, 0.012   | -0.078                 | -0.116, -0.042 |
| Quadratic                   | 0.0014                | 0.0010, 0.0019 | 0.0008              | 0.0002, 0.0014 | 0.0011                 | 0.0007, 0.0016 |
| <b>HIV status</b>           |                       |                |                     |                |                        |                |
| Uninfected                  | Ref                   | -              | Ref                 | -              | Ref                    | -              |
| Infected                    | -1.130                | -1.488, -0.797 | -0.559              | -0.860, -0.246 | -0.881                 | -1.193, -0.583 |
| <b>Number of Partners</b>   |                       |                |                     |                |                        |                |
| Linear                      | -0.021                | -0.027, -0.015 | -0.024              | -0.028, -0.019 | -0.008                 | -0.013, -0.004 |

· 95% CrI = 95% credible interval

**Table S5.** Varying Intercept Negative Binomial Model Coefficients for Per-Year Rates of All Bacterial STI (Syphilis, Gonorrhea, Chlamydia) Testing/Screening by Symptomatic Status among US Men Who Have Sex with Men Who Tested/Screened At Least Once in Past 2 Years

|                             | <b>All Testing/Screening</b> |                  | <b>Asymptomatic Screening</b> |                  |
|-----------------------------|------------------------------|------------------|-------------------------------|------------------|
|                             | <i>Estimate</i>              | <i>95% CrI</i>   | <i>Estimate</i>               | <i>95% CrI</i>   |
| <b>Geography</b>            |                              |                  |                               |                  |
| Average Intercept           | -0.129                       | -0.470, 0.192    | -0.232                        | -0.616, 0.119    |
| City                        |                              |                  |                               |                  |
| <i>Atlanta</i>              | -0.084                       | -0.434, 0.257    | 0.190                         | -0.578, 0.176    |
| <i>Boston</i>               | -0.107                       | -0.462, 0.232    | -0.210                        | -0.613, 0.167    |
| <i>Chicago</i>              | -0.102                       | -0.452, 0.235    | -0.205                        | -0.603, 0.164    |
| <i>Dallas</i>               | -0.117                       | -0.481, 0.217    | -0.234                        | -0.639, 0.142    |
| <i>Denver</i>               | -0.113                       | -0.476, 0.232    | -0.205                        | -0.610, 0.184    |
| <i>Detroit</i>              | -0.095                       | -0.455, 0.254    | -0.164                        | -0.575, 0.234    |
| <i>Houston</i>              | -0.197                       | -0.569, 0.145    | -0.332                        | -0.768, 0.051    |
| <i>Los Angeles</i>          | -0.139                       | -0.490, 0.196    | -0.231                        | -0.631, 0.134    |
| <i>Miami</i>                | -0.075                       | -0.429, 0.274    | -0.195                        | -0.595, 0.179    |
| <i>New York City</i>        | -0.153                       | -0.510, 0.176    | -0.247                        | -0.645, 0.115    |
| <i>Philadelphia</i>         | -0.126                       | -0.480, 0.207    | -0.249                        | -0.651, 0.122    |
| <i>San Diego</i>            | -0.119                       | -0.482, 0.220    | -0.220                        | -0.627, 0.157    |
| <i>San Francisco</i>        | -0.068                       | -0.422, 0.277    | -0.161                        | -0.557, 0.220    |
| <i>Seattle</i>              | -0.121                       | -0.480, 0.212    | -0.229                        | -0.631, 0.141    |
| <i>Washington DC</i>        | -0.165                       | -0.531, 0.168    | -0.286                        | -0.698, 0.083    |
| Census Division             |                              |                  |                               |                  |
| <i>1 New England</i>        | -0.153                       | -0.517, 0.188    | -0.238                        | -0.645, 0.137    |
| <i>2 Middle Atlantic</i>    | -0.105                       | -0.460, 0.233    | -0.231                        | -0.637, 0.144    |
| <i>3 East North Central</i> | -0.190                       | -0.553, 0.142    | -0.295                        | -0.701, 0.074    |
| <i>4 West North Central</i> | -0.160                       | -0.512, 0.174    | -0.243                        | -0.643, 0.122    |
| <i>5 South Atlantic</i>     | -0.182                       | -0.535, 0.149    | -0.295                        | -0.692, 0.067    |
| <i>6 East South Central</i> | -0.109                       | -0.465, 0.232    | -0.209                        | -0.610, 0.169    |
| <i>7 West South Central</i> | -0.117                       | -0.471, 0.213    | -0.208                        | -0.602, 0.161    |
| <i>8 Mountain</i>           | -0.184                       | -0.550, 0.156    | -0.297                        | -0.711, 0.076    |
| <i>9 Pacific</i>            | -0.155                       | -0.512, 0.174    | -0.244                        | -0.645, 0.123    |
| <b>Race</b>                 |                              |                  |                               |                  |
| Black (Non-Hisp)            | 0.105                        | -0.021, 0.236    | 0.120                         | -0.017, 0.257    |
| Hispanic                    | 0.116                        | 0.018, 0.215     | 0.133                         | 0.027, 0.239     |
| Other (Non-Hisp)            | 0.204                        | 0.086, 0.321     | 0.213                         | 0.093, 0.335     |
| White (Non-Hisp)            | Ref                          | -                | Ref                           | -                |
| <b>Age</b>                  |                              |                  |                               |                  |
| Linear                      | 0.029                        | 0.012, 0.048     | 0.030                         | 0.011, 0.051     |
| Quadratic                   | -0.0004                      | -0.0007, -0.0002 | -0.0004                       | -0.0007, -0.0002 |
| <b>HIV status</b>           |                              |                  |                               |                  |
| Uninfected                  | Ref                          | -                | Ref                           | -                |
| Infected                    | 0.276                        | 0.180, 0.371     | 0.260                         | 0.159, 0.362     |
| <b>Number of Partners</b>   |                              |                  |                               |                  |
| Linear                      | 0.008                        | 0.007, 0.010     | 0.008                         | 0.006, 0.010     |
| <b>Dispersion Parameter</b> |                              |                  |                               |                  |
|                             | 4.994                        | 4.321, 5.850     | 5.115                         | 4.375, 6.071     |

· 95% CrI = 95% credible interval
